# Supplementary material for: A Novel Gold Calreticulin Nanocomposite Based on Chitosan for Wound Healing in a Diabetic Mice Model
Source: PubMed Central journal article supplement (PMC6359502; doi:10.3390/nano9010075), 2019-01-08
Supplement: nanomaterials-09-00075-s001.pdf [file nanomaterials-09-00075-s001.pdf]

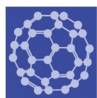

1 Supplementary Materials

2  
3  
4

Table S1. Comparisons of body weight and blood glucose in healthy and diabetic mice before and after treatments.

| Groups                   | Body Weight (g)  |                 | Blood glucose (mg/dL) |                 |
|--------------------------|------------------|-----------------|-----------------------|-----------------|
|                          | Before treatment | After treatment | Before treatment      | After treatment |
| Healthy (buffer citrate) | 23.73±1.5        | 24.30±0.66      | 90±7.48               | 100.32±5.06     |
| Diabetic (SZT)           | 24.397±0.319     | 25.44±0.94**    | 92±8.03               | 221.46±7.51***  |

5

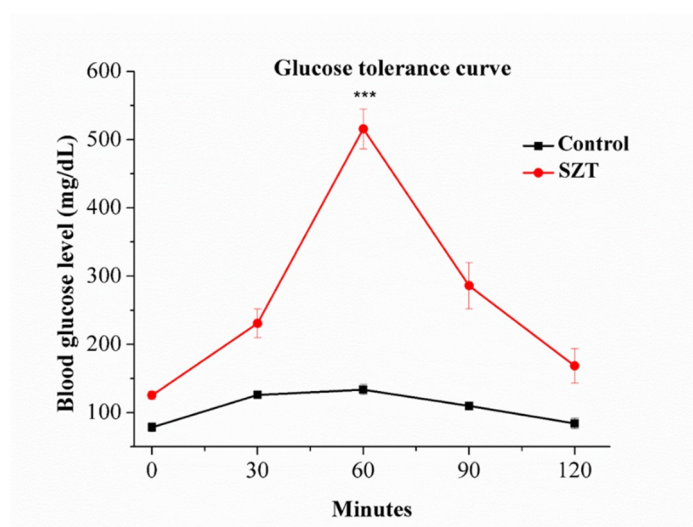

6  
7  
8  
9  
10

Figure S1. Glucose tolerance test. Concentration of blood glucose in healthy and diabetic mice after received dextrose orally. Significance difference was observed at 60 minutes (\*\*\*) ( $p < 0.0001$ ).
